# Supplementary material for: In vitro selenium supplementation suppresses key mediators involved in myometrial activation and rupture of fetal membranes
Source: Royal Society of Chemistry journal article supplement (doi:10.1039/d0mt00063a), 2020-04-29
Supplement: d0mt00063a1.pdf [file d0mt00063a1.pdf]

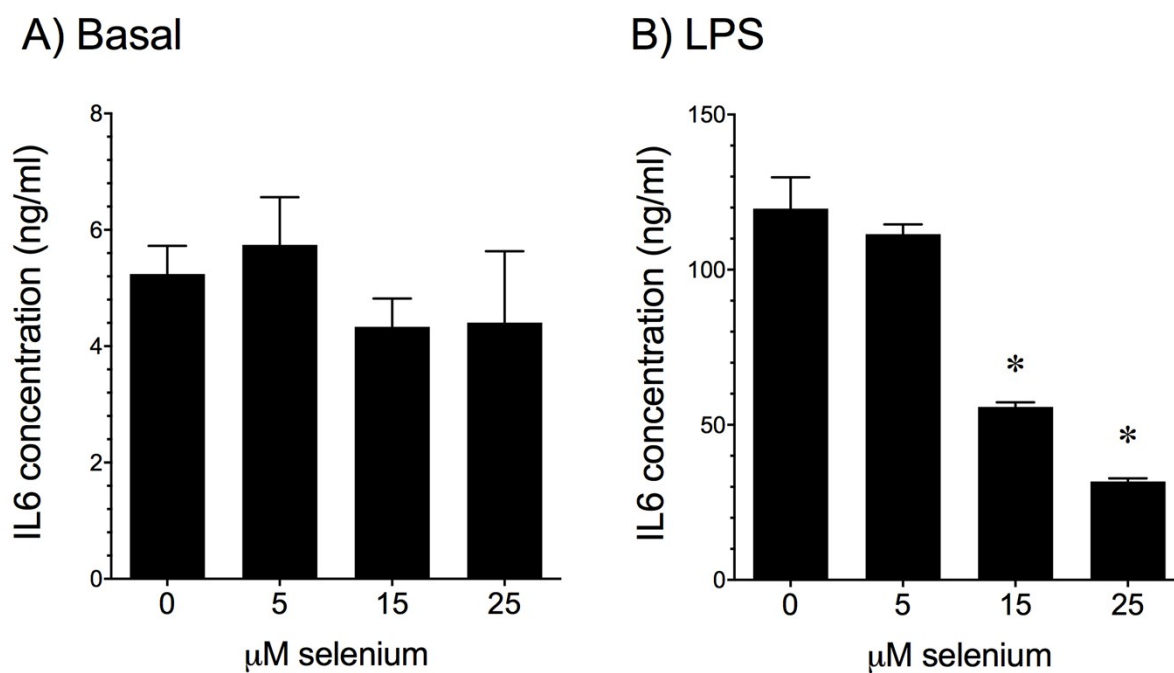

**Supplementary Figure 1. Effect of different concentrations of selenium on basal and LPS induced IL6 secretion**

(A) Fetal membranes were incubated with 0, 5, 15 or 25 µM selenium for 20 h (n=3). (B) Fetal membranes were incubated with 0, 5, 15 or 25 µM selenium for 1 h and then treated with 10 µg/ml LPS for a further 20 h (n=3). The concentration of IL6 in the incubation medium was assayed by ELISA. All data is displayed as mean  $\pm$  SEM.  $*P \leq 0.05$  vs 0 µM selenium, repeated measures one-way ANOVA.
